# Supplementary material for: Polymorph and isomer conversion of complexes based on CuI and PPh3easily observed via luminescence
Source: Royal Society of Chemistry journal article supplement (doi:10.1039/c1dt11462j), 2011-11-07
Supplement: c1dt11462j.pdf [file c1dt11462j.pdf]

# Polymorph and isomer conversion of complexes based on CuI and PPh<sub>3</sub> easily observed *via* luminescence

Dario Braga,<sup>a</sup> Lucia Maini,<sup>a</sup> Paolo P. Mazzeo<sup>a</sup> and Barbara Ventura<sup>b</sup>

<sup>a</sup>*Dipartimento di Chimica "G. Ciamician", Università degli studi di Bologna, Via Selmi 2, 40126 Bologna, Italy.*

<sup>b</sup>*Istituto per la Sintesi Organica e la Fotoreattività (ISOF) – CNR, Via Gobetti 101, 40129 Bologna (Italy)*

## Supplementary Information

7 pages

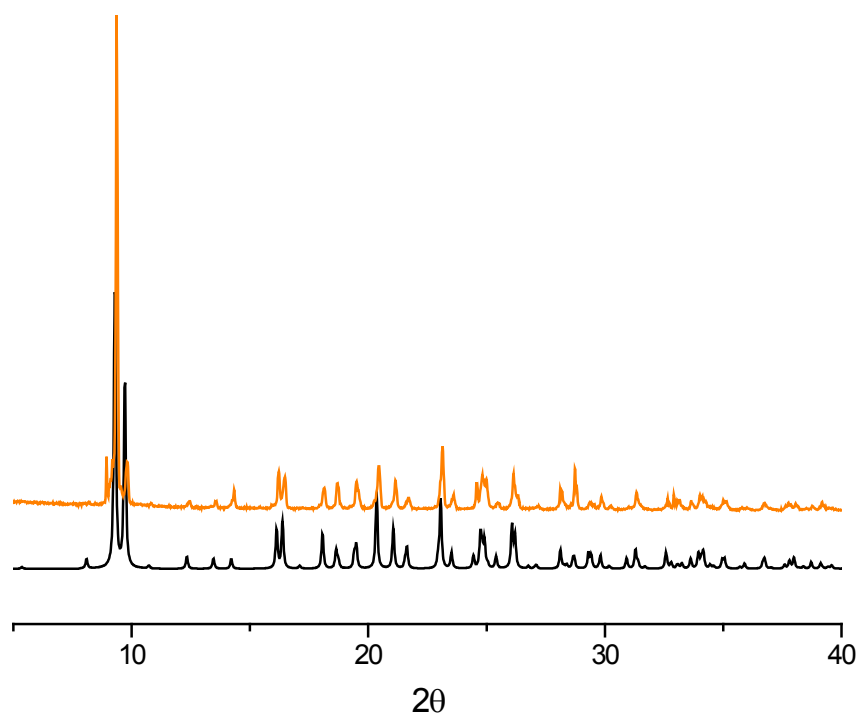

**Figure S1:** experimental and calculated diffraction pattern comparison for  $[\text{CuI}(\text{PPh}_3)_3]\alpha$

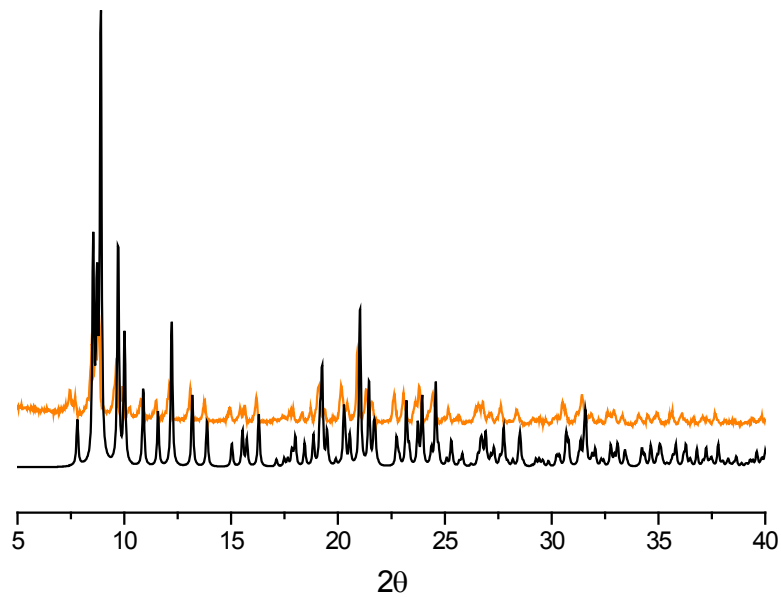

**Figure S2:** experimental and calculated diffraction pattern comparison for  $[\text{Cu}_2\text{I}_2(\text{PPh}_3)_3]$

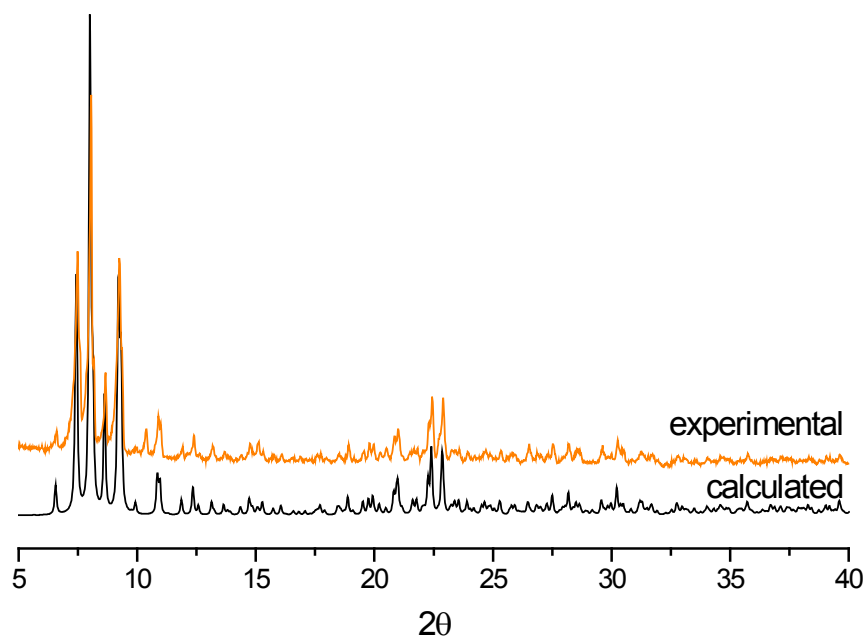

**Figure S3:** experimental and calculated patter comparison for [CuI(PPh<sub>3</sub>)<sub>4</sub>]**1a**

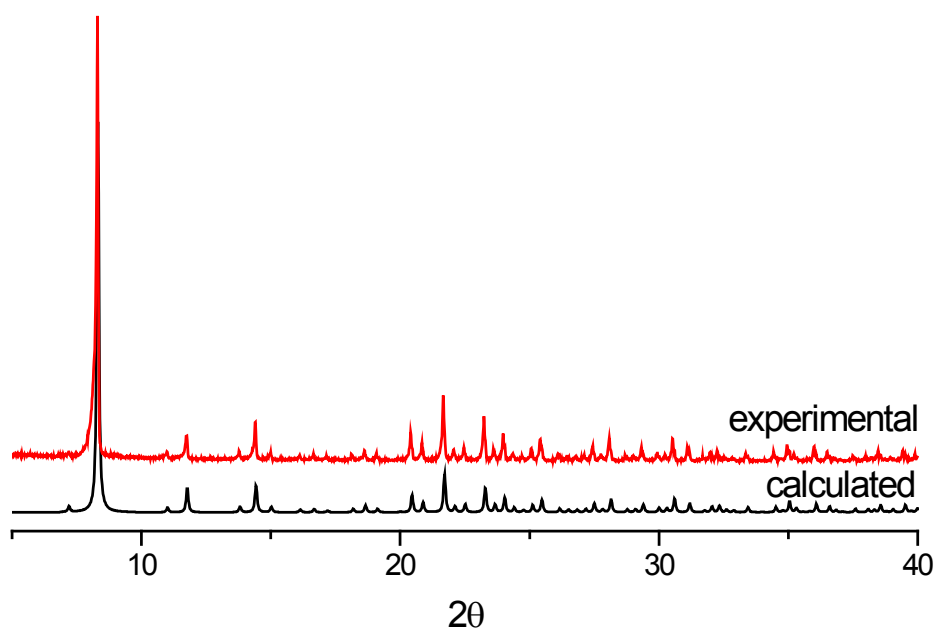

**Figure S4:** experimental and calculated patter comparison for [CuI(PPh<sub>3</sub>)<sub>4</sub>]**1b**

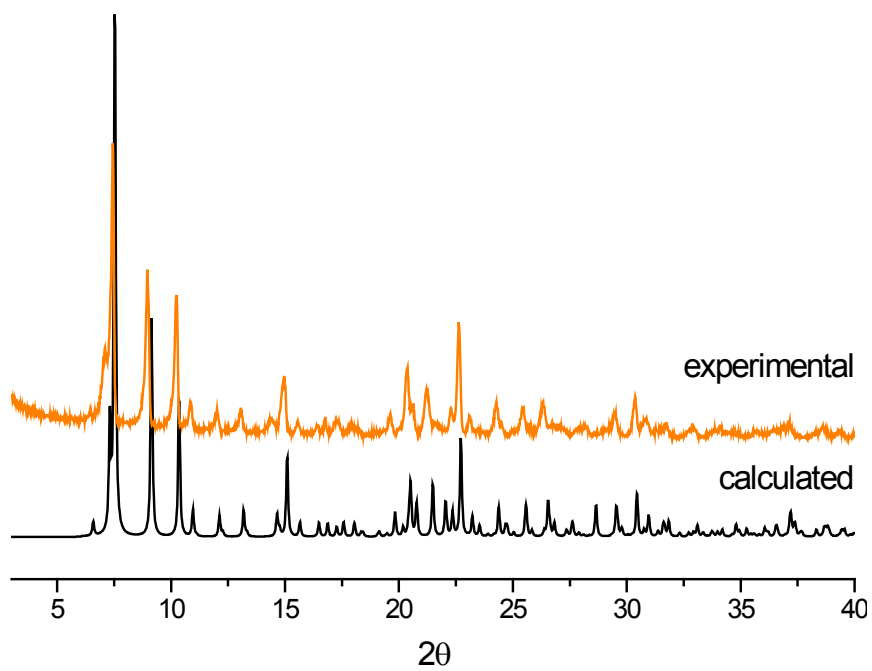

**Figure S5:** experimental and calculated patter comparison for  $[\text{CuI}(\text{PPh}_3)]_{4.2}$

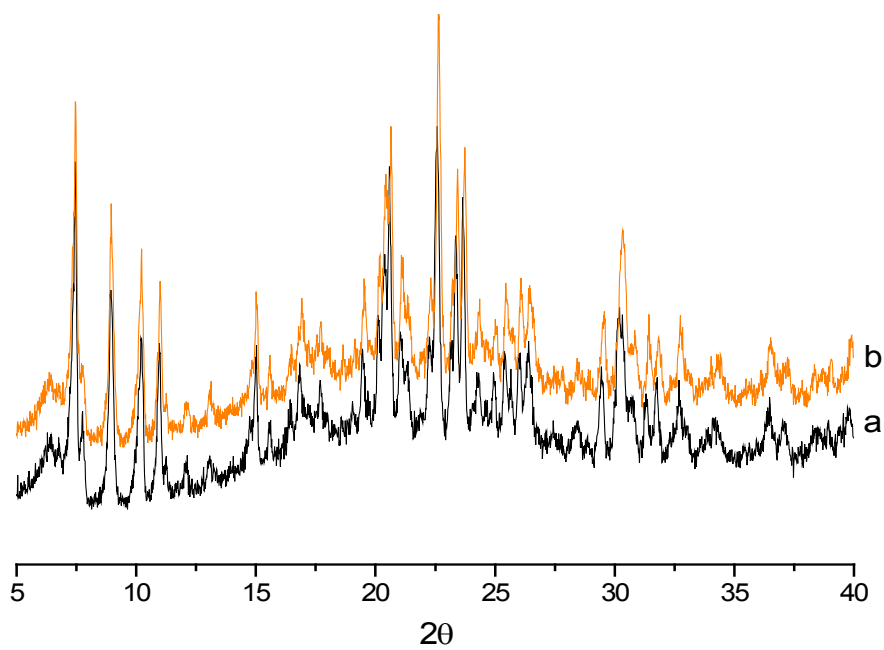

**Figure S6:** experimental and calculated patter comparison for  $[\text{CuI}(\text{PPh}_3)]_{4.2}$

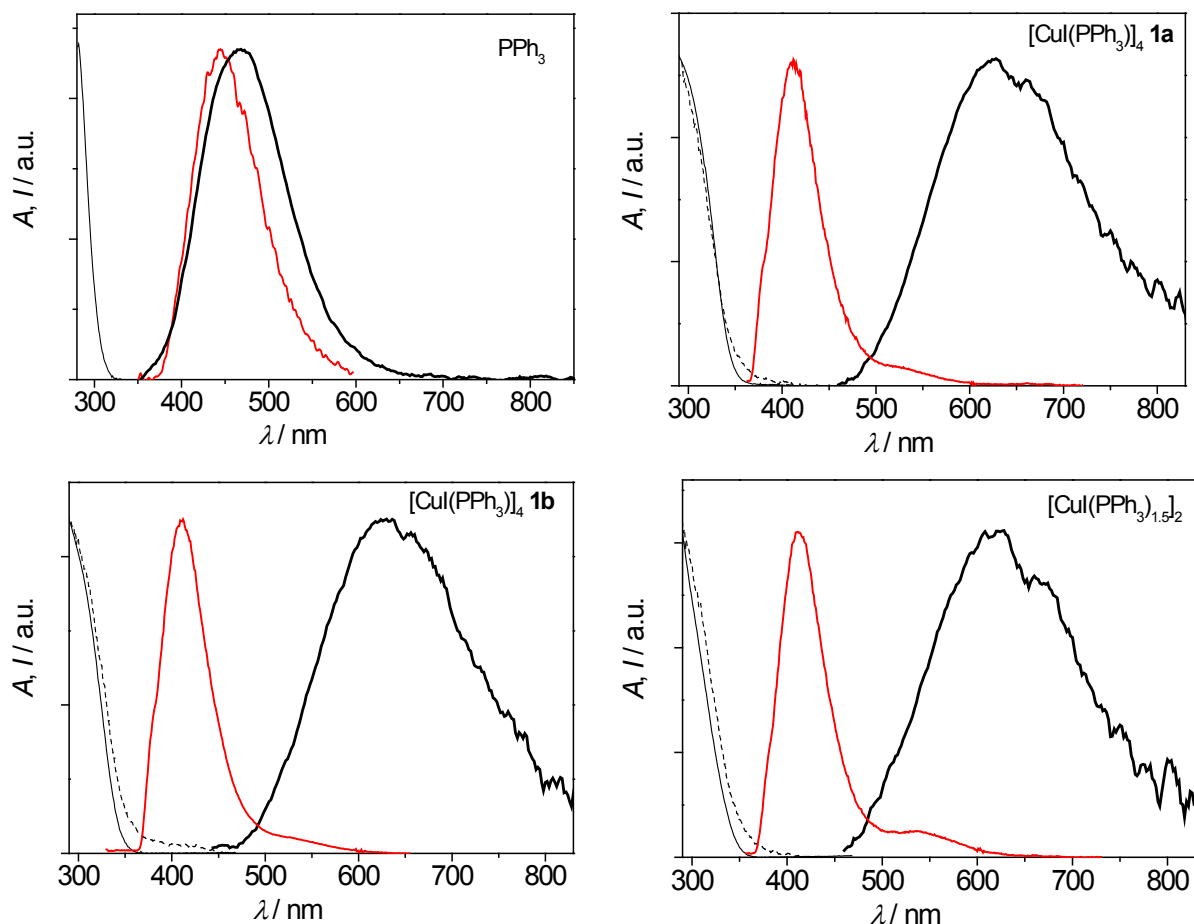

**Figure S7:** arbitrarily scaled absorption (black thin) and room temperature (black thick) and 77K (red) corrected emission spectra of toluene solutions of PPh<sub>3</sub> and compounds [Cu<sub>4</sub>I<sub>4</sub>(PPh<sub>3</sub>)<sub>4</sub>] **1a**, [Cu<sub>4</sub>I<sub>4</sub>(PPh<sub>3</sub>)<sub>4</sub>] **1b** and [CuI(PPh<sub>3</sub>)<sub>1.5</sub>]<sub>2</sub>; excitation at 300 nm for PPh<sub>3</sub> and 330 nm for the Cu(I) complexes. The room temperature excitation spectra of the complexes measured at 620 nm are also reported (dash).

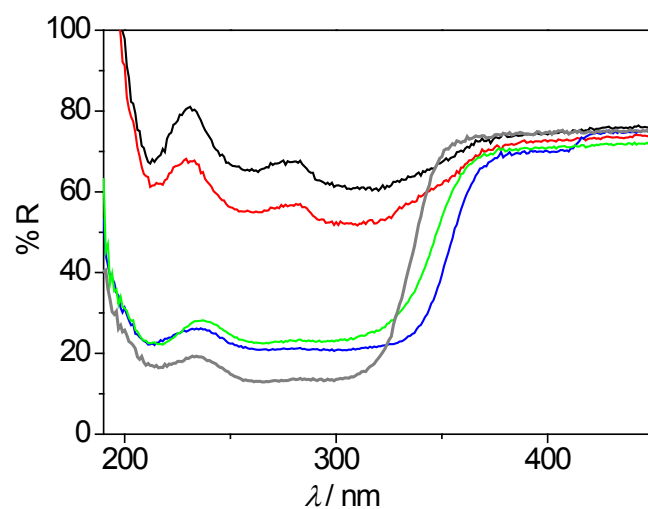

**Figure S8:** reflectance spectra of solid samples of PPh<sub>3</sub> (grey), [Cu<sub>4</sub>I<sub>4</sub>(PPh<sub>3</sub>)<sub>4</sub>] **1b** (black), [Cu<sub>4</sub>I<sub>4</sub>(PPh<sub>3</sub>)<sub>4</sub>] **1a** (red), [CuI(PPh<sub>3</sub>)<sub>4</sub>] **2** (blue) and [CuI(PPh<sub>3</sub>)<sub>1.5</sub>]<sub>2</sub> (green).

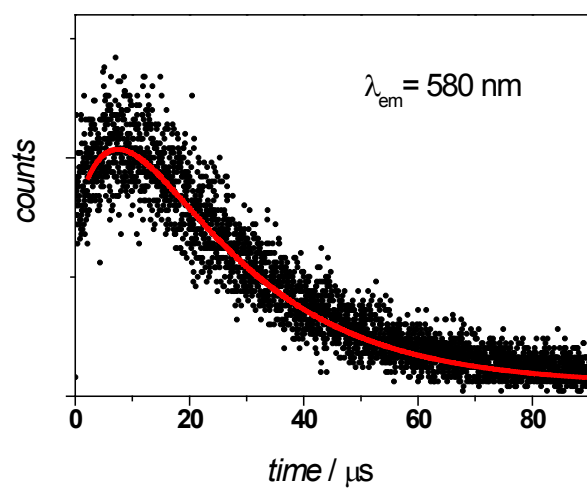

**Figure S9:** luminescence profile at 580 nm of solid  $[\text{Cu}_4\text{I}_4(\text{PPh}_3)_4]$  **1a** at 77 K and the bi-exponential fitting (red).

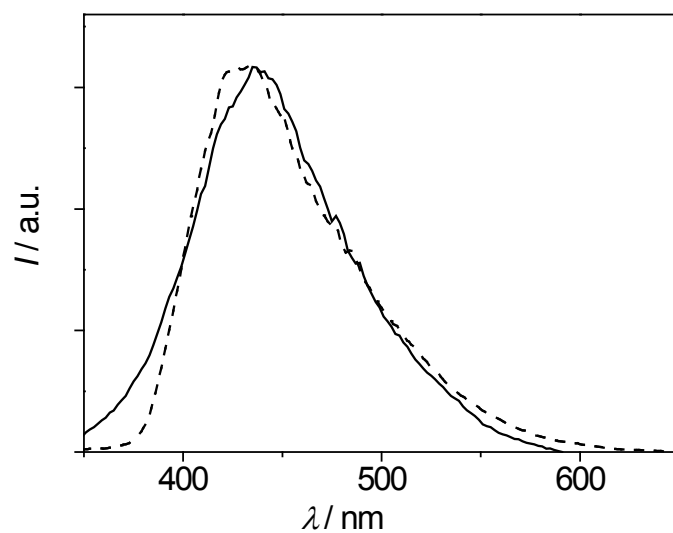

**Figure S10:** normalized corrected emission spectra of solid  $\text{PPh}_3$  at room temperature (solid line) and 77 K (dashed line). Excitation at 300 nm.

**Table S1.** Crystal data and details of measurement for compound crystallized in this work.

|                                                                                           | <i>[CuI(PPh<sub>3</sub>)<sub>3</sub>]b</i>          | <i>[Cu<sub>4</sub>I<sub>4</sub>(PPh<sub>3</sub>)<sub>4</sub>]1a</i>         | <i>[Cu<sub>4</sub>I<sub>4</sub>(PPh<sub>3</sub>)<sub>4</sub>]1b</i>         | <i>[CuI(PPh<sub>3</sub>)<sub>2</sub>]<sub>1.5</sub>*CH<sub>2</sub>Cl<sub>2</sub></i>      |
|-------------------------------------------------------------------------------------------|-----------------------------------------------------|-----------------------------------------------------------------------------|-----------------------------------------------------------------------------|-------------------------------------------------------------------------------------------|
| <b>Chemical formula</b>                                                                   | <i>C<sub>54</sub>H<sub>45</sub>CuIP<sub>3</sub></i> | <i>C<sub>72</sub>H<sub>60</sub>Cu<sub>4</sub>I<sub>4</sub>P<sub>4</sub></i> | <i>C<sub>72</sub>H<sub>60</sub>Cu<sub>4</sub>I<sub>4</sub>P<sub>4</sub></i> | <i>C<sub>55</sub>H<sub>47</sub>Cl<sub>2</sub>Cu<sub>2</sub>I<sub>2</sub>P<sub>3</sub></i> |
| <b><i>M<sub>r</sub></i></b>                                                               | 977.25                                              | 1811.85                                                                     | 1810.84                                                                     | 1252.62                                                                                   |
| <b>Crystal system</b>                                                                     | Monoclinic                                          | Monoclinic                                                                  | Cubic                                                                       | Monoclinic                                                                                |
| <b>Space group</b>                                                                        | <i>P2<sub>1</sub>/c</i>                             | <i>P2<sub>1</sub>/n</i>                                                     | <i>I-43d</i>                                                                | <i>P2<sub>1</sub>/c</i>                                                                   |
| <b><i>T</i> [K]</b>                                                                       | RT                                                  | 90                                                                          | 90                                                                          | RT                                                                                        |
| <b><i>a</i> [Å]</b>                                                                       | 13.2375 (5)                                         | 13.4237 (10)                                                                | 29.7864 (3)                                                                 | 15.7252(6)                                                                                |
| <b><i>b</i> [Å]</b>                                                                       | 18.5976 (7)                                         | 26.406 (3)                                                                  |                                                                             | 19.5305(7)                                                                                |
| <b><i>c</i> [Å]</b>                                                                       | 18.9297 (7)                                         | 19.4266 (11)                                                                |                                                                             | 17.6410(8)                                                                                |
| <b><math>\beta</math> (°)</b>                                                             | 93.953 (4)                                          | 99.531 (7)                                                                  |                                                                             | 110.473(5)                                                                                |
| <b><i>V</i> (Å<sup>3</sup>)</b>                                                           | 4649.1 (3)                                          | 6791.0 (9)                                                                  | 26427.4 (5)                                                                 | 5075.7(4)                                                                                 |
| <b><i>Z</i></b>                                                                           | 4                                                   | 4                                                                           | 16                                                                          | 4                                                                                         |
| <b><i>F</i> (000)</b>                                                                     | 1984                                                | 3524                                                                        | 14080                                                                       | 2480                                                                                      |
| <b><math>\theta</math> range [°]</b>                                                      | 2.68 – 29.02                                        | 2.78 – 29.18                                                                | 2.56 – 29.01                                                                | 2.68 – 29.09                                                                              |
| <b>Radiation type</b>                                                                     | Mo K $\alpha$                                       | Mo K $\alpha$                                                               | Mo K $\alpha$                                                               | Mo K $\alpha$                                                                             |
| <b><math>\mu</math> (mm<sup>-1</sup>)</b>                                                 | 1.27                                                | 3.19                                                                        | 3.28                                                                        | 2.29                                                                                      |
| <b>Measured reflns</b>                                                                    | 24269                                               | 35458                                                                       | 13317                                                                       | 32388                                                                                     |
| <b>Unique reflns</b>                                                                      | 10549                                               | 15590                                                                       | 4275                                                                        | 11167                                                                                     |
| <b>Parameters</b>                                                                         | 424                                                 | 758                                                                         | 253                                                                         | 578                                                                                       |
| <b>GOF on <i>F</i><sup>2</sup></b>                                                        | 0.76                                                | 1.04                                                                        | 1.02                                                                        | 1.23                                                                                      |
| <b><i>R<sub>int</sub></i></b>                                                             | 0.035                                               | 0.100                                                                       | 0.046                                                                       | 0.072                                                                                     |
| <b><i>R<sub>1</sub></i> (on <i>F</i>, [<i>I</i> &gt; 2<math>\sigma</math>(<i>I</i>)])</b> | 0.044                                               | 0.046                                                                       | 0.038                                                                       | 0.106                                                                                     |
| <b><i>wR</i>(<i>F</i><sup>2</sup>)</b>                                                    | 0.130                                               | 0.112                                                                       | 0.061                                                                       | 0.323                                                                                     |
